# Supplementary material
Source: MDPI journal article supplement (https://www.mdpi.com/2227-7390/11/9/2094)
Supplement: s1 [file s1]

Archive with 1 entries (1 files):
- Supplementary File S1.pdf
